# Supplementary material for: A Microfluidic Approach for Probing Heterogeneity in Cytotoxic T-Cells by Cell Pairing in Hydrogel Droplets
Source: Micromachines (Basel). 2022 Nov 4;13(11):1910. doi: 10.3390/mi13111910 (PMC9692327; doi:10.3390/mi13111910)
Supplement: Supplementary file 1 [file micromachines-13-01910-s001.zip]

Archive with 7 entries (7 files):
- eppendorf tube device.stl
- pipette tip device.stl
- platform device.stl
- supplementary figures.pdf
- Supplementary video 1.mp4
- Supplementary video 2.mp4
- Supplementary video 3.mp4
